*The Department of Anesthesiology  
Wilford Hall USAF Medical Center  
Lackland AFB, Texas 78236*

REFERENCES

1. Ray RN, Cassell BS, Chaplin H Jr: In vitro and in vivo observations on stored sickle trait red blood cells. *Am J Clin Pathol* 32:430-435, 1959
2. Kaufman M, Steier W, Applewhite F: Sickle-cell trait in blood donors. *Am J Med Sci* 42:56-61, 1965

3. Hipp MJ, Scott RB: Altered filterability of CPD-stored sickle trait donor blood. *Transfusion* 14:447-452, 1974
4. Meryman HT, Hornblower M: Freezing and deglycerolizing sickle-trait red blood cells. *Transfusion* 16:627-632, 1976
5. Kelleher JF Jr, Luban LC: Transfusion of frozen erythrocytes from a donor with sickle trait. *Transfusion* 24:167-168, 1983
6. Novak RW, Brown RE: Multiple renal and splenic infarctions in a neonate following transfusion with sickle trait blood. *Clin Pediatr* 21:239-241, 1981

(Accepted for publication January 14, 1988.)

Anesthesiology  
68:821, 1988

## Sedation for Patients with Parkinson's Disease Undergoing Ophthalmologic Surgery

*To the Editor:*—Parkinson's disease consists of tremor, rigidity, bradykinesia, and, eventually, difficulties in posture.<sup>1</sup> The neuropharmacological defect consists of a deficiency of dopaminergic input in the basal ganglia. There is also a cholinergic input which opposes and normally balances the dopaminergic effect. Drug therapy for the disease includes increasing dopaminergic effects and/or inhibiting cholinergic transmission.<sup>2</sup>

Patients presenting for ophthalmologic surgery under local anesthesia with sedation may possess a head tremor making it impossible for the surgeon to operate. None of the usual modes of sedation (narcotics, benzodiazapines) act to diminish the tremor, and other sedatives (phenothiazines, butyrophenones) are contraindicated because they block the central dopamine receptor. Diphenhydramine (Benadryl®) is an H<sub>1</sub> receptor-blocking antihistamine that has central anticholinergic activity, is inexpensive, and is generally available on anesthesia carts for the treatment of allergic reactions.<sup>3</sup> Anticholinergic drugs have been replaced as first-line therapy by L-dopa, but L-dopa (and central dopamine agonists such as bromocriptine) cannot be given intravenously.<sup>2</sup> We have found that diphenhydramine administered in 25-mg iv increments produces

a well-sedated patient with minimal tremor. We have not encountered oversedation or delirium with the use of diphenhydramine in this setting.

DAVID J. STONE, M.D.

*Assistant Professor of Anesthesiology and Internal Medicine*

COSMO A. DIFAZIO, M.D., PH.D.

*Professor of Anesthesiology*

*Department of Anesthesiology*

*University of Virginia Medical Center*

*Charlottesville, Virginia 22908*

REFERENCES

1. Kadis LB: Neurological disorders, *Anesthesia and Uncommon Diseases*. Edited by Katz J, Benumof J, Kadis LB. Philadelphia, W. B. Saunders, 1981
2. Bianchine JR: Drugs for Parkinson's Disease, spasticity and acute muscle spasms, *The Pharmacological Basis of Therapeutics*. Edited by Gilman AG, Goodman LS, Rall TW, Murad F. New York, MacMillan, 1985
3. Douglas WW: Histamine and 5-Hydroxytryptamine (serotonin) and their antagonists, *The Pharmacological Basis of Therapeutics*. Edited by Gilman AG, Goodman LS, Rall TW, Murad F. New York, MacMillan, 1985

(Accepted for publication January 14, 1988.)
